# Supplementary material for: One-Pot Decoration of Cupric Oxide on Activated Carbon Fibers Mediated by Polydopamine for Bacterial Growth Inhibition
Source: MDPI journal article supplement (doi:10.3390/ma13051158), 2020-03-05
Supplement: s1 [file s1]

*Supplementary Information*

# **One-pot Decoration of Cupric Oxide on Activated Carbon Fibers Mediated by Polydopamine for the Inhibition of Bacteria Growth**

**Hangil Moon <sup>1</sup>, Young-Chul Lee <sup>2,\*</sup> and Jaehyun Hur <sup>1,\*</sup>**

<sup>1</sup> Department of Chemical and Biological Engineering, Gachon University, Seongnam-si, Gyeonggi-do 13120, Korea; etenelsnow@naver.com

<sup>2</sup> Department of BioNano Technology, Gachon University, Seongnam-si, Gyeonggi-do 13120, Korea

\* Correspondence: dreamdb@gachon.ac.kr (Y.-C.L.); jhhur@gachon.ac.kr (J.H.); Tel: +82-31-750-8751 (Y.-C.L.); +82-10-750-5593 (J.H.)

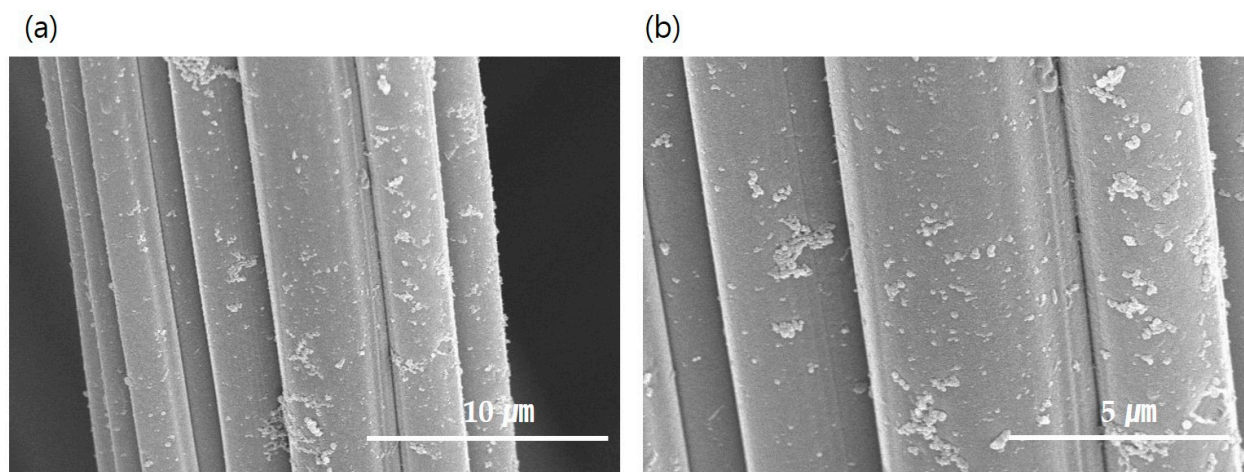

**Figure S1.** SEM images of ACF@PD at (a) low and (b) high magnification.

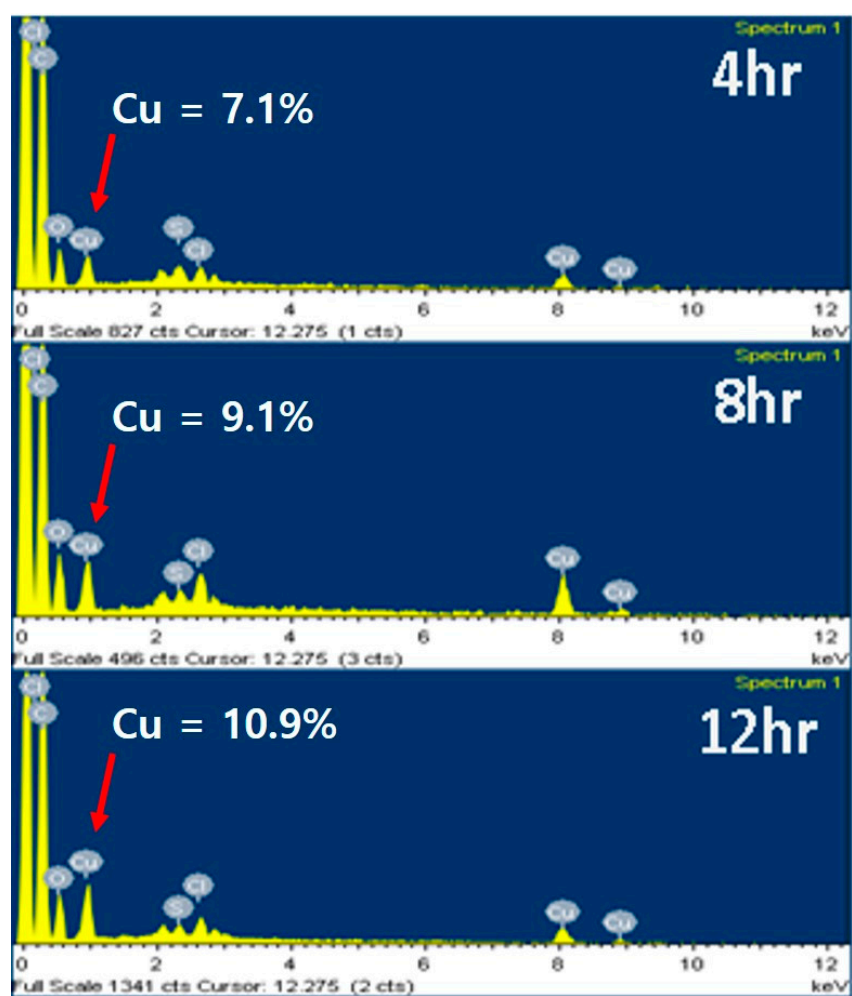

**Figure S2.** Cu content of ACF@PD-CuO with different coating time obtained from EDS analysis.

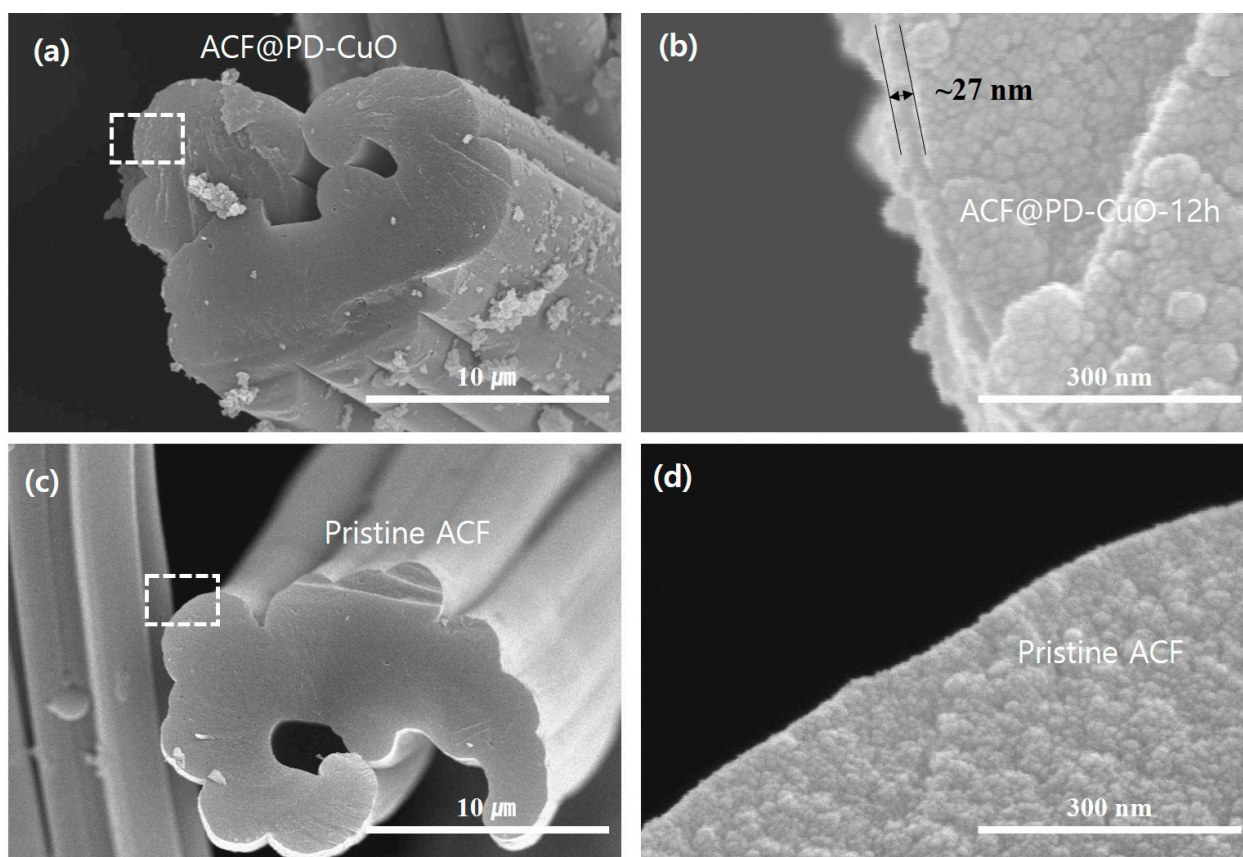

**Figure S3.** SEM images of ACF@PD-CuO-12h with (a) low- and (b) high-magnification and pristine ACF with (c) low- and (d) high-magnification to measure the precise coating thickness of PD-CuO.

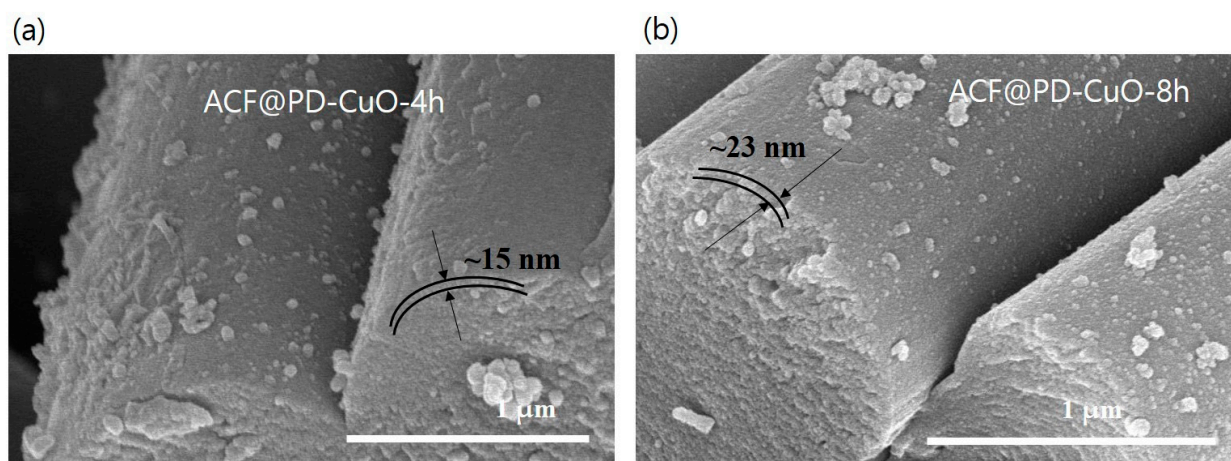

**Figure S4.** SEM images of (a) ACF@PD-CuO-4h and (b) ACF@PD-CuO-8h for measuring the coating thickness of PD-CuO.



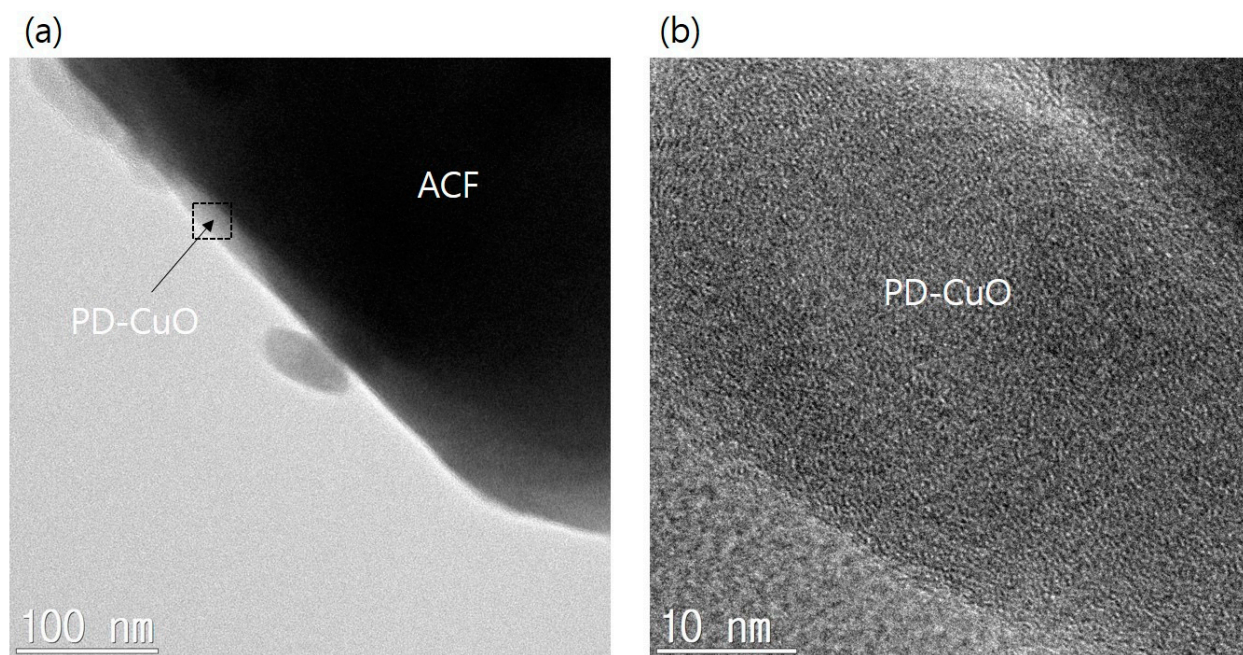

**Figure S5.** TEM images of ACF@PD-CuO-12h at (a) low and (b) high magnification.

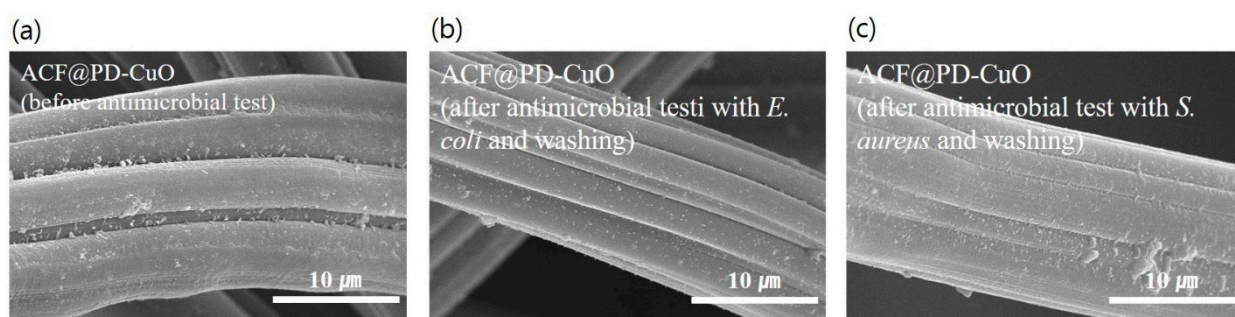

**Figure S6.** Ex-situ SEM images for ACF@PD-CuO (a) before the and after the antimicrobial test and washing: (b) *E-coli* and (c) *S-aureus*.
